# Supplementary material for: GPER1 links estrogens to centrosome amplification and chromosomal instability in human colon cells
Source: Life Sci Alliance. 2022 Nov 16;6(1):e202201499. doi: 10.26508/lsa.202201499 (PMC9670797; doi:10.26508/lsa.202201499)
Supplement: Supplementary file 3 [file LSA-2022-01499_SdataF2.xlsx]

## Sheet: Fig2_p values
	Distribution frequencies of centrosomes & centrioles
		3 centrosomes			4 centrosomes			>4 centrosomes
A	g-tubulin	10 nM E2	10 nM BPA	10 nM DES	10 nM E2	10 nM BPA	10 nM DES	10 nM E2	10 nM BPA	10 nM DES
	HCT116	4e-05	0.00025	0.00144	0.107	0.0445	0.112	0.231	0.24	0.104
	CCD 841 CoN	0.002	0.00152	0.013	0.0404	0.0101	0.0632	0.507	0.509	0.231
	HCT-15	0.0327	0.0327	0.00777	0.17	0.285	1	0.25	0.048	0.25
	RKO	0.0116	0.00236	0.00236	1	0.0727	0.241	0.328	0.328	1
		3 centrosomes			4 centrosomes			>4 centrosomes
B	CP110	10 nM E2	10 nM BPA	10 nM DES	10 nM E2	10 nM BPA	10 nM DES	10 nM E2	10 nM BPA	10 nM DES
	HCT116	0.000253	0.000362	0.000177	0.00618	0.486	0.361	1	0.491	1
	CCD 841 CoN	0.0107	0.0366	0.0108	0.444	1	1	1	0.491	1
	HCT-15	0.0486	0.0802	0.0196	0.0703	0.107	1	1	1	0.0961
	RKO	0.0394	0.00189	0.013	0.17	0.17	0.048	0.288	1	0.287
		3 centrosomes			4 centrosomes			>4 centrosomes
C	Cep135	10 nM E2	10 nM BPA	10 nM DES	10 nM E2	10 nM BPA	10 nM DES	10 nM E2	10 nM BPA	10 nM DES
	HCT116	0.0189	0.00616	0.00891	0.00259	0.00259	0.00146	0.0583	0.211	0.211
	CCD 841 CoN	0.185	0.265	0.0411	<1,00E-05	1e-05	1e-05	0.126	0.00984	0.493
	HCT-15	0.0135	0.0095	0.00466	0.0246	0.0246	0.0482	1	1	1
	RKO	0.0434	0.00559	0.00793	0.0331	0.163	0.0331	0.328	0.328	1
	centrosome amplification upon PLK4 repression
D	HCT116
	DMSO		E2		BPA		DES
	SCR	PLK4	SCR	PLK4	SCR	PLK4	SCR	PLK4
			0.00513		0.00184		0.0026
		0.846		0.00513		0.0011		0.00671
	Overduplication of centrioles: Sas6-intensity
G	HCT116			HCT-15
	DMSO			DMSO
	E2	0.1396		E2	<0,0001
	BPA	0.0009		BPA	<0,0001
	DES	0.0033		DES	<0,0001
