# Supplementary material for: GPER1 links estrogens to centrosome amplification and chromosomal instability in human colon cells
Source: Life Sci Alliance. 2022 Nov 16;6(1):e202201499. doi: 10.26508/lsa.202201499 (PMC9670797; doi:10.26508/lsa.202201499)
Supplement: Supplementary file 5 [file LSA-2022-01499_SdataFS3.xlsx]

## Sheet: FigS3_p values
	Centrosome amplification (γ-Tubulin) upon GPER re-expression
G	HCT116
	E2			BPA		DES
	SCR	GPER	GPER	GPER	GPER	GPER	GPER
	Ctr	Ctr	RES	Ctr	RES	Ctr	RES
		0.0052	1	0.00221	0.408	0.00221	0.408
H	CCD 841 CoN
	E2			BPA		DES
	SCR	GPER	GPER	GPER	GPER	GPER	GPER
	Ctr	Ctr	RES	Ctr	RES	Ctr	RES
		0.00186	1	0.00186	1	0.00299	1
	Centrosome amplification (γ-Tubulin) upon GPER repression
I	HCT-15
	DMSO		E2		BPA		DES
	SCR	GPER	SCR	GPER	SCR	GPER	SCR	GPER
			0.0148		0.00752		0.00752
		0.826		0.0352		0.0826		0.0421
K	HCT-15
	DMSO		E2		BPA		DES
	DMSO	G15	DMSO	G15	DMSO	G15	DMSO	G15
			0.0091		0.0091		0.00223
		1		0.00544		0.00544		0.000744
	Centrosome amplification upon exposure to antiestrogens
J	HCT116		L	CCD 841 CoN
	DMSO			DMSO
	ICI	0.0238		ICI	0.00514
	DMSO			Tam	0.0223
	Tam	0.000155
