# Supplementary material for: GPER1 links estrogens to centrosome amplification and chromosomal instability in human colon cells
Source: Life Sci Alliance. 2022 Nov 16;6(1):e202201499. doi: 10.26508/lsa.202201499 (PMC9670797; doi:10.26508/lsa.202201499)
Supplement: Supplementary file 6 [file LSA-2022-01499_SdataF3.xlsx]

## Sheet: Fig3_p values
	Centrosome amplification (γ-Tubulin) upon GPER repression
A	HCT116
	DMSO		E2		BPA		DES
	SCR	GPER	SCR	GPER	SCR	GPER	SCR	GPER
			0.000175		8.76e-05		0.00131
		0.149		0.00172		0.000921		0.0614
B	CCD 841 CoN
	DMSO		E2		BPA		DES
	SCR	GPER	SCR	GPER	SCR	GPER	SCR	GPER
			0.0019		0.00101		0.00264
		0.653		0.00533		0.00152		0.0232
	Centrosome amplification (γ-Tubulin) upon GPER inhibition
C	HCT116
	DMSO			E2			BPA			DES
	DMSO	G15	G36	DMSO	G15	G36	DMSO	G15	G36	DMSO	G15	G36
				0.00313			0.0023			0.00313
	0.761				0.0069	0.0069		0.000946	0.00149		0.00205	0.0069
D	CCD 841 CoN
	DMSO			E2			BPA			DES
	DMSO	G15	G36	DMSO	G15	G36	DMSO	G15	G36	DMSO	G15	G36
				0.00276			0.00414			0.00336
	0.592				0.0377	0.0133		0.0464	0.0464		0.00616	0.0814
	Centrosome amplification (γ-Tubulin) upon GPER activation
E	HCT116		F	CCD 841 CoN
	DMSO			DMSO
	G1	0.000881		G1	0.00734
