# Supplementary material for: GPER1 links estrogens to centrosome amplification and chromosomal instability in human colon cells
Source: Life Sci Alliance. 2022 Nov 16;6(1):e202201499. doi: 10.26508/lsa.202201499 (PMC9670797; doi:10.26508/lsa.202201499)
Supplement: Supplementary file 19 [file LSA-2022-01499_SdataF6.xlsx]

## Sheet: Fig6_p values
	Lagging Chromosomes upon GPER repression
A	HCT116
	DMSO		E2		BPA		DES		Noc
	SCR	GPER	SCR	GPER	SCR	GPER	SCR	GPER	SCR	GPER
			0.0244		0.0244		0.047		0.034
		0.665		0.0244		0.015		0.188		0.435
B	CCD 841 CoN
	DMSO		E2		BPA		DES		Noc
	DMSO	G15	DMSO	G15	DMSO	G15	DMSO	G15	DMSO	G15
			0.0158		0.0158		0.0158		0.0024
		0.665		0.0478		0.000819		0.0122		0.649
